# Supplementary material
Source: publisher figshare collection journal article supplement (https://tandf.figshare.com/ndownloader/files/16616420)
Supplement: Supplementary file 1 [file 16616420]

**Supporting Information**

Submitted for Publication in

**Environmental Tecnologies Journal**

September 2018

Natural fluorescence emission - an indirect measurement of applied ozone doses in polished for pharmaceuticals wastewater

Aikaterini Spiliotopoulou1-3, Maria G. Antoniou4,*,and ‎ Henrik R. Andersen3

1OxyGuard International A/S, Farum Gydevej 64, 3520 Farum, Denmark

2Water ApS, Farum Gydevej 64, 3520 Farum, Denmark

3Department of Environmental Engineering, Technical University of Denmark, Bygningstorvet 115, 2800 Kongens Lyngby, Denmark

4Department of Environmental Science and Technology, Cyprus University of Technology, 3036 Limassol, Cyprus

*Corresponding author: maria.antoniou@cut.ac.cy

1. Wastewater treatment plants

| **WWTP** | **Name** |
| --- | --- |
| Källby 1 | Effluents 1 |
| Källby 2 | Effluents 2 |
| Björnstorp | Effluent 3 |
| Öresundsverket | Effluent 4 |
| Sjölunda | Effluent 5 |
| Nykvarnsverket | Effluent 6 |

1. Ozone dosages applied in each experiment

Table S1: Ozone dosages applied in each experiment [15].

| WWTP | Ozonation  Levels | Effluent 1 | Effluent 2 | Effluent 3 | Effluent 4 | Effluent 5 | Effluent 6 |
| --- | --- | --- | --- | --- | --- | --- | --- |
| Applied ozone dosage  (mg O3/L) | 6 | 10.2 | 11.7 | 8.0 | 7.8 | 8.9 | 7.7 |
| 5 | 6.9 | 7.1 | 5.3 | 5.5 | 6.1 | 6.2 |
| 4 | 5.0 | 5.4 | 3.5 | 3.6 | 4.4 | 4.5 |
| 3 | 2.6 | 2.4 | 2.0 | 2.1 | 2.3 | 2.4 |
| 2 | 1.3 | 1.2 | 1.1 | 1.1 | 1.1 | 1.2 |
| 1 | 0.6 | 0.6 | 0.5 | 0.6 | 0.5 | 0.6 |

1. Fluorescence removal
   1. First order decay

Figure S1: Fluorescence removal of ozonated wastewater at EX231Em315-first order decay analysis.

Figure S2: Fluorescence removal of ozonated wastewater at EX231Em360-first order decay analysis.

Figure S3: Fluorescence removal of ozonated wastewater at EX249Em450-first order decay analysis.

Figure S4: Fluorescence removal of ozonated wastewater at EX275Em310-first order decay analysis.

Figure S5: Fluorescence removal of ozonated wastewater at EX335Em450-first order decay analysis.

Figure S6: Fluorescence removal of ozonated wastewater at EX335Em450-first order decay analysis.

- 1. Linear regression

Figure S7: Fluorescence removal of ozonated wastewater at EX231Em315-linear regression analysis.

Figure S8: Fluorescence removal of ozonated wastewater at EX231Em360-linear regression analysis.

Figure S9: Fluorescence removal of ozonated wastewater at EX249Em450-linear regression analysis.

Figure S10: Fluorescence removal of ozonated wastewater at EX275Em310-linear regression analysis.

Figure S11: Fluorescence removal of ozonated wastewater at EX275Em340-linear regression analysis.

Figure S12: Fluorescence removal of ozonated wastewater at EX335Em450-linear regression analysis.

- 1. Fluorescence sensitivity

Table S2: Slope and R2 comparison between the two humic-like wavelength transitions when applied ozone dosages (0-11 mg O3/L).

|  | | Ex249Em450 | | | Ex335Em450 | |
| --- | --- | --- | --- | --- | --- | --- |
| WWTPs | R2 | | Slope | R2 | | Slope |
| Eff 1 | 0.9455 | | -40.01 | 0.9335 | | -34.39 |
| Eff 2 | 0.9378 | | -33.44 | 0.9221 | | -27.63 |
| Eff 3 | 0.8975 | | -33.82 | 0.8717 | | -27.83 |
| Eff 4 | 0.9665 | | -51.14 | 0.9632 | | -44.62 |
| Eff 5 | 0.9818 | | -45.51 | 0.9936 | | -47.98 |
| Eff 6 | 0.9906 | | -44.75 | 0.9897 | | -39.25 |

Table S3: Slope and R2 comparison between the two humic-like wavelength transitions when applied low ozone dosages (0-3 mg O3/L).

|  | | Ex249Em450 | | | Ex335Em450 | |
| --- | --- | --- | --- | --- | --- | --- |
| WWTPs | R2 | | Slope | R2 | | Slope |
| Eff 1 | 0.6095 | | -38.71 | 0.7566 | | -45.26 |
| Eff 2 | 0.9588 | | -48.34 | 0.9603 | | -44.25 |
| Eff 3 | 0.9728 | | -63.94 | 0.9847 | | -55.86 |
| Eff 4 | 0.8680 | | -50.16 | 0.8831 | | -47.63 |
| Eff 5 | 0.8447 | | -32.14 | 0.9306 | | -41.46 |
| Eff 6 | 0.9250 | | -46.67 | 0.9589 | | -42.93 |

- 1. APIs sensitivity

Figure S13: Correlation of matrix (Effluent 2; Kalby 2) fluorescence at Ex249Em450nm with the corresponding remaining API concentration

Figure S14: Correlation of matrix (Effluent 3; Björnstorp) fluorescence at Ex249Em450nm with the corresponding remaining API concentration.

Figure S15: Correlation of matrix (Effluent 4; Öresundsverket) fluorescence at Ex249Em450nm with the corresponding remaining API concentration.

Figure S16: Correlation of matrix (Effluent 5; Sjölunda) fluorescence at Ex249Em450nm with the corresponding remaining API concentration.

Figure S17: Correlation of matrix (Effluent 6; Nykvansverket) fluorescence at Ex249Em450nm with the corresponding remaining API concentration.

Table S4: Slope and R2 of APIs from Eff1 (Kalby1) when applied ozone dosages (0-11 mg O3/L).

|  | Ex249Em450 |  |
| --- | --- | --- |
| Eff1 | R2 | Slope |
| Repaglinide | 0.7607 | 1.055 |
| Codeine | 0.7979 | 0.9957 |
| Naproxen | 0.8268 | 1.115 |
| Amitryptiline | 0.9001 | 1.067 |
| Bisoprolol | 0.9468 | 1.223 |
| Metoprolol | 0.9540 | 1.195 |
| Memantine | 0.8561 | 0.8665 |
| Flutamide | 0.4375 | 0.6744 |
| Beclomethazone | 0.4767 | 0.5520 |

Table S5: Slope and R2 of APIs from Eff2 (Kalby2) when applied ozone dosages (0-11 mg O3/L).

|  | Ex249Em450 |  |
| --- | --- | --- |
| Eff1 | R2 | Slope |
| Repaglinide | 0.7809 | 1.111 |
| Codeine | 0.8278 | 1.197 |
| Naproxen | 0.8944 | 1.208 |
| Amitryptiline | 0.9708 | 1.226 |
| Bisoprolol | 0.9569 | 1.270 |
| Metoprolol | 0.9556 | 1.219 |
| Memantine | 0.8918 | 1.039 |
| Flutamide | 0.8085 | 0.7443 |
| Beclomethazone | 0.5130 | 0.8047 |

Table S6: Slope and R2 of APIs from Eff3 when applied ozone dosages (0-11 mg O3/L).

|  | Ex249Em450 |  |
| --- | --- | --- |
| Eff1 | R2 | Slope |
| Repaglinide | 0.7469 | 1.103 |
| Codeine | 0.7907 | 1.276 |
| Naproxen | 0.7835 | 1.074 |
| Amitryptiline | 0.8801 | 1.176 |
| Bisoprolol | 0.9399 | 1.361 |
| Metoprolol | 0.9268 | 1.326 |
| Memantine | 0.7347 | 0.9027 |
| Flutamide | 0.7590 | 0.9789 |
| Beclomethazone | 0.8361 | 1.216 |

Table S7: Slope and R2 of APIs from Eff4 when applied ozone dosages (0-11 mg O3/L).

|  | Ex249Em450 |  |
| --- | --- | --- |
| Eff1 | R2 | Slope |
| Repaglinide | 0.8822 | 1.266 |
| Codeine | 0.9094 | 1.333 |
| Naproxen | 0.8148 | 1.002 |
| Amitryptiline | 0.9455 | 1.119 |
| Bisoprolol | 0.9608 | 1.276 |
| Metoprolol | 0.9488 | 1.306 |
| Memantine | 0.8945 | 0.8512 |
| Flutamide | 0.8520 | 0.6855 |
| Beclomethazone | 0.7958 | 0.8688 |

Table S8: Slope and R2 of APIs from Eff5 when applied ozone dosages (0-11 mg O3/L).

|  | Ex249Em450 |  |
| --- | --- | --- |
| Eff1 | R2 | Slope |
| Repaglinide | 0.9267 | 1.656 |
| Codeine | 0.9235 | 1.585 |
| Naproxen | 0.9383 | 1.598 |
| Amitryptiline | 0.8726 | 1.020 |
| Bisoprolol | 0.9277 | 1.146 |
| Metoprolol | 0.8808 | 1.114 |
| Memantine | 0.7072 | 0.5957 |
| Flutamide | 0.2642 | 0.3361 |
| Beclomethazone | 0.1387 | -0.2782 |

Table S9: Slope and R2 of APIs from Eff6 when applied ozone dosages (0-11 mg O3/L).

|  | Ex249Em450 |  |
| --- | --- | --- |
| Eff1 | R2 | Slope |
| Repaglinide | 0.4156 | 0.7053 |
| Codeine | 0.7872 | 1.166 |
| Naproxen | 0.6969 | 0.9740 |
| Amitryptiline | 0.8916 | 1.339 |
| Bisoprolol | 0.9411 | 1.408 |
| Metoprolol | 0.9501 | 1.088 |
| Memantine | 0.8435 | 0.8959 |
| Flutamide | 0.6005 | 0.7235 |
| Beclomethazone | 0.7511 | 1.1174 |

Figure S18: Correlation between fluorescence and absorbance at 254 nm and DOC in the six non-ozonated wastewater effluents.
